# Supplementary material
Source: HighWire-hosted journal article supplement (https://www.cmaj.ca/content/suppl/2015/01/05/cmaj.140609)
Supplement: image-boggild-1-at.pdf [file image-boggild-1-at.pdf]

## Appendix 1: Differential diagnosis for migratory skin lesions/angioedema and eosinophilia

| Clinical manifestations*                    | Infectious Etiologies        |                      |                                                               |                        |                        |                           |
|---------------------------------------------|------------------------------|----------------------|---------------------------------------------------------------|------------------------|------------------------|---------------------------|
|                                             | Loiasis                      | Trichinosis          | Strongyloidiasis                                              | Gnathostomiasis        | Toxocariasis           | Paragonomiasis            |
| Travel to central African rainforest region | Y                            | N                    | Y                                                             | N                      | N                      | N                         |
| Eosinophilia                                | Y                            | Y                    | Y                                                             | Y                      | Y                      | Y                         |
| Migratory skin lesions / angioedema         | Y                            | Y                    | Y                                                             | Y                      | Y                      | Y                         |
| Fever                                       | N                            | N                    | Y                                                             | N                      | Y                      | Y                         |
| Arthritis/arthritis                         | Y                            | N                    | N                                                             | N                      | Y <sup>1</sup>         | Y <sup>1</sup>            |
| Proteinuria                                 | Y                            | N                    | N                                                             | N                      | Y <sup>1</sup>         | N                         |
| Rash (urticarial)                           | Y                            | Y                    | Y                                                             | Y                      | Y                      | Y                         |
| Eye symptoms                                | Y                            | N                    | N                                                             | N                      | Y                      | N                         |
| Respiratory symptoms/cough                  | Y <sup>1</sup>               | Y                    | Y                                                             | Y                      | Y                      | Y                         |
| <u>Non-infectious Etiologies</u>            |                              |                      |                                                               |                        |                        |                           |
| Clinical manifestations*                    | Systemic Lupus Erythrematous | Rheumatoid Arthritis | Eosinophilic granulomatosis with polyangiitis (Churg Strauss) | C1 esterase deficiency | Hematologic malignancy | Drug-related <sup>2</sup> |
| Travel to endemic region                    | N                            | N                    | N                                                             | N                      | N                      | N                         |
| Eosinophilia                                | Y <sup>1</sup>               | N                    | N                                                             | N                      | Y                      | Y <sup>1</sup>            |
| Migratory skin lesions / angioedema         | Y                            | Y                    | Y                                                             | Y                      | Y                      | Y                         |
| Fever                                       | Y                            | Y                    | Y                                                             | N                      | Y                      | Y                         |
| Arthritis/arthritis                         | Y                            | Y                    | Y                                                             | N                      | Y                      | N                         |
| Proteinuria                                 | Y                            | N                    | Y                                                             | N                      | Y                      | N                         |
| Rash (urticarial)                           | Y                            | Y                    | N                                                             | Y                      | Y                      | Y                         |
| Eye symptoms                                | Y                            | Y                    | N                                                             | N                      | Y                      | N                         |
| Respiratory symptoms/cough                  | Y                            | Y                    | Y                                                             | N                      | Y                      | N                         |

\* Clinical manifestations may not be present in all cases or at all stages of the disease.

1 Rare manifestations documented in limited cases.

2 ASA, NSAIDS, ACE-inhibitors.

Adapted from Dellen V, G R, Maddox DE, Dutta EJ. Masqueraders of angioedema and urticaria. *Ann Allergy Asthma Immunol.* 2002 Jan;88(1):10–5.
